# Supplementary material
Source: PubMed Central journal article supplement (PMC9643164)
Supplement: mmc1.pdf [file mmc1.pdf]

Supporting Information for

Original article

## Schaftoside inhibits 3CL<sup>pro</sup> and PL<sup>pro</sup> of SARS-CoV-2 virus and regulates immune response and inflammation of host cells for the treatment of COVID-19

Yang Yi<sup>a,†</sup>, Meng Zhang<sup>a,†</sup>, Heng Xue<sup>b,c,†</sup>, Rong Yu<sup>a</sup>, Yang-Oujie Bao<sup>a</sup>, Yi Kuang<sup>a</sup>, Yue Chai<sup>a</sup>, Wen Ma<sup>a</sup>, Jing Wang<sup>a</sup>, Xiaomeng Shi<sup>a</sup>, Wenzhe Li<sup>a</sup>, Wei Hong<sup>b,c</sup>, Junhua Li<sup>b,c</sup>, Elishiba Muturi<sup>b,c</sup>, Hongping Wei<sup>b,c</sup>, Joachim Wlodarz<sup>d</sup>, Szczepan Roszak<sup>e</sup>, Xue Qiao<sup>a,\*</sup>, Hang Yang<sup>b,c,\*</sup>, Min Ye<sup>a,\*</sup>

<sup>a</sup>State Key Laboratory of Natural and Biomimetic Drugs, School of Pharmaceutical Sciences, Peking University, Beijing 100191, China

<sup>b</sup>CAS Key Laboratory of Special Pathogens and Biosafety, Center for Biosafety Mega-Science, Wuhan Institute of Virology, Chinese Academy of Sciences, Wuhan 430071, China

<sup>c</sup>University of Chinese Academy of Sciences, Beijing 100049, China

<sup>d</sup>Faculty of Science and Technology, University of Silesia, Katowice 40-007, Poland

<sup>e</sup>Department of Physical and Quantum Chemistry, Faculty of Chemistry, Wrocław University of Science and Technology, Wrocław 50-370, Poland

Received 9 February 2022; received in revised form 5 May 2022; accepted 22 June 2022

\*Corresponding authors. Tel./fax: +86 10 82801516 (Min Ye).

E-mail addresses: [qiaoxue@bjmu.edu.cn](mailto:qiaoxue@bjmu.edu.cn) (Xue Qiao); [yangh@wh.iov.cn](mailto:yangh@wh.iov.cn) (Hang Yang); [yemin@bjmu.edu.cn](mailto:yemin@bjmu.edu.cn) (Min Ye).

†These authors made equal contributions to this work.

### 1. Supporting methods

#### 1.1. Experimental details for proteomics analysis

Vero E6 cells were infected with SARS-CoV-2 virus, or with schaftoside and SARS-CoV-2 for 24 h (MOI=1), respectively. The sample was sonicated three times on ice using a high intensity ultrasonic processor (Scientz) in lysis buffer (8 mmol/L urea, 1% protease inhibitor cocktail). The debris was removed by centrifugation at 12,000 × g at 4 °C for 10 min. The supernatant was then collected and the protein concentration was measured by BCA kit. The sample was added with one volume of pre-cooled acetone, vortexed to mix, and then added with four

volumes of pre-cooled acetone, precipitated at  $-20\text{ }^{\circ}\text{C}$  for 2 h. The sample was then redissolved in 200 mmol/L TEAB and ultrasonically dispersed. For the first digestion overnight, trypsin was added at 1:50 trypsin-to-protein mass ratio. The sample was reduced with 5 mmol/L dithiothreitol for 60 min at  $37\text{ }^{\circ}\text{C}$  and alkylated with 11 mmol/L iodoacetamide for 45 min at room temperature in darkness. The peptides were desalted on a Strata X SPE column. Tryptic peptides were dissolved in 0.5 mmol/L TEAB. Each channel of peptide was labeled by their respective TMT reagent (based on manufacturer's protocol, ThermoFisher Scientific), and incubated for 2 h at room temperature. An aliquot of 5  $\mu\text{L}$  of each sample was pooled, desalted and analyzed by MS to check labeling efficiency. Then, samples were quenched by adding 5% hydroxylamine. The pooled samples were desalted with a Strata X C18 SPE column (Phenomenex) and dried by vacuum centrifugation.

The tryptic peptides were dissolved in solvent A (0.1% formic acid and 2% acetonitrile in water), directly loaded onto a home-made reversed-phase analytical column (25 cm length, 75  $\mu\text{m}$  i.d.). Peptides were separated with a gradient from 5% to 25% solvent B (0.1% formic acid in 90% acetonitrile) over 60 min, 25% to 35% in 22 min, and up to 80% in 4 min, and then held at 80% for 4 min, all at a constant flow rate of 450 nL/min on an EASY-nLC 1200 UPLC system (ThermoFisher Scientific). The separated peptides were characterized by a Q Exactive HF-X mass spectrometer (ThermoFisher Scientific) with a nano-electrospray ion source. The electrospray voltage was 2.0 kV and the full MS scan resolution was set to 60,000 for a scan range of  $m/z$  350–1600. Up to 20 most abundant precursor ions were selected for MS/MS analyses with 30-s dynamic exclusion. The HCD fragmentation was performed at a normalized collision energy (NCE) of 28% and the fragments were detected in the Orbitrap at a resolution of 30,000. Fixed first mass was set at  $m/z$  100. Automatic gain control (AGC) target was set at  $1\text{E}5$ , with an intensity threshold of  $3.3\text{E}4$  and a maximum injection time of 60 ms.

## *1.2. Pharmacokinetic study*

Male C57BL/6J mice (20 g) were provided by the Experimental Animal Center of Peking University Health Science Center (Beijing, China). Schaftoside (150 mg/kg) was given by

intraperitoneal injection. Blood samples were collected from rat orbit into heparinized tubes at 1, 4, 8, 10, 12, 24, and 48 h, respectively, and were immediately centrifuged at 15,000 rpm (Eppendorf, Centrifuge 5424R, Germany, 4 °C) for 30 min to obtain the plasma. Then 100  $\mu$ L of plasma sample was mixed with 300  $\mu$ L of methanol and 100  $\mu$ L IS solution (internal standard, 5  $\mu$ g/mL orientin in methanol). The mixture was vortexed to precipitate protein and then centrifuged at 15,000 rpm for 30 min. The supernatant was separated, dried, and then dissolved in 100  $\mu$ L of 50% methanol. The sample was centrifuged (15,000 rpm for 30 min) and the supernatant was analyzed by LC–MS/MS. Samples were separated on a Waters Acquity UPLC BEH C18 column (1.7  $\mu$ mol/L, 2.1 mm $\times$ 50 mm) (Waters, USA). The column temperature was 30 °C. The mobile phase consisted of water containing 0.1% formic acid (v/v, A) and acetonitrile (B). A 5-min gradient elution program was used: 0–1 min, 10%–50% B; 1–2 min, 50%–90% B; 2–3 min, 90% B; 3.1–5 min, 10% B. The flow rate was 0.3 mL/min. The injection volume was 2  $\mu$ L. Mass spectrometry analysis was performed on an API 4000 QTRAP mass spectrometer equipped with a TurboIonSpray source (Foster City, USA). Schaftoside and orientin (IS) were determined by multiple reaction monitoring (MRM) in the negative ion mode, with MRM transitions of  $m/z$  563.5 $\rightarrow$ 353.0 and  $m/z$  447.4 $\rightarrow$ 327.0, respectively. The data were analyzed by Analyst 1.4.1 software. For schaftoside, the regression equation was  $y=0.000331x-0.00063$  ( $r=0.9998$ ), where  $y$  represents the ratio of schaftoside peak area to IS peak area,  $x$  the concentration (ng/mL), and  $r$  the correlation coefficient. The linear range was from 5–5000 ng/mL.

## 2. Supporting figures

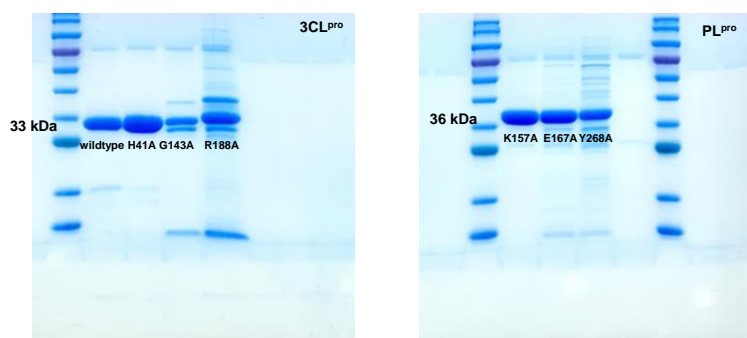

**Figure S1** SDS-PAGE of non-tagged SARS-CoV-2 virus 3CL<sup>pro</sup>, PL<sup>pro</sup>, and their mutants.

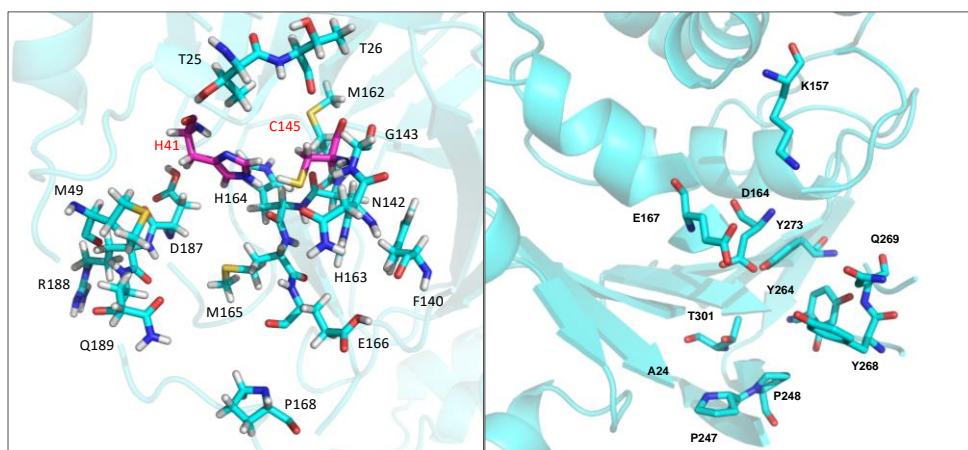

**Figure S2** Active pockets of SARS-CoV-2 3CL<sup>pro</sup> and PL<sup>pro</sup>, including residues T25, T26, H41, C44, M49, F140, N142, G143, C145, M162, H163, H164, M165, E166, P168, D187, R188, Q189 and Q192 of 3CL<sup>pro6</sup>, and residues K157, D164, E167, A246, P247, P248, Y264, Y268, Q269, Y273 and T301 of PL<sup>pro10</sup>.

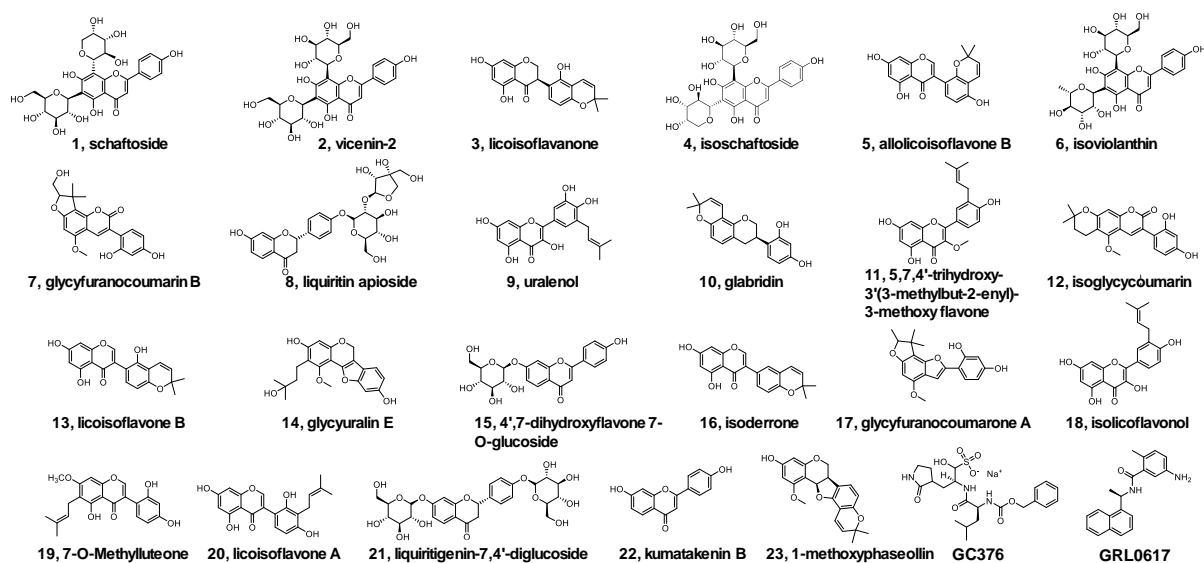

**Figure S3** Structures of licorice hit compounds. GC376 and GLR0617 were used as the positive controls.

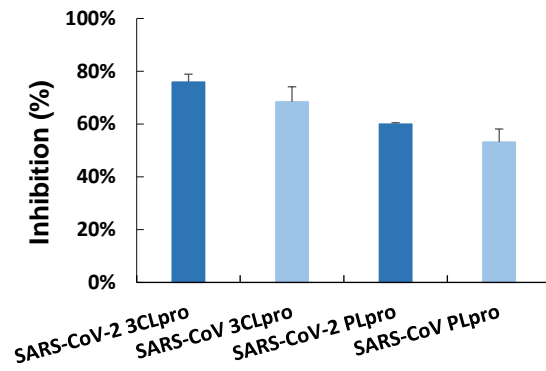

**Figure S4** Inhibitory activities of schaftoside (8  $\mu\text{mol/L}$ ) against SARS-CoV-2 virus 3CL<sup>pro</sup> and PL<sup>pro</sup>, and SARS-CoV virus 3CL<sup>pro</sup> and PL<sup>pro</sup> ( $n = 3$ ).

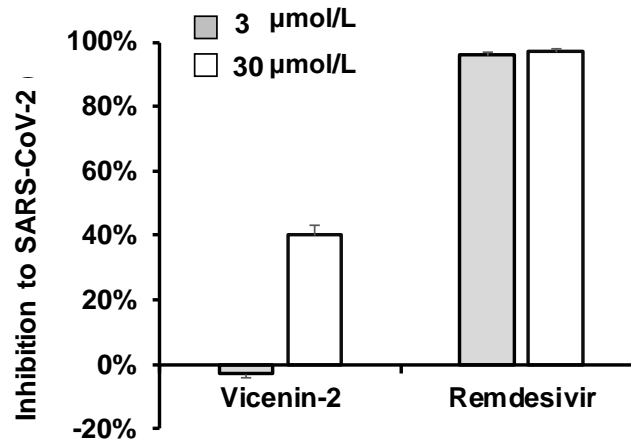

**Figure S5** Inhibition of vicenin-2 against SARS-CoV-2 virus at 3  $\mu\text{mol/L}$  and 30  $\mu\text{mol/L}$  ( $n = 3$ ). Remdesivir was used as the positive control.

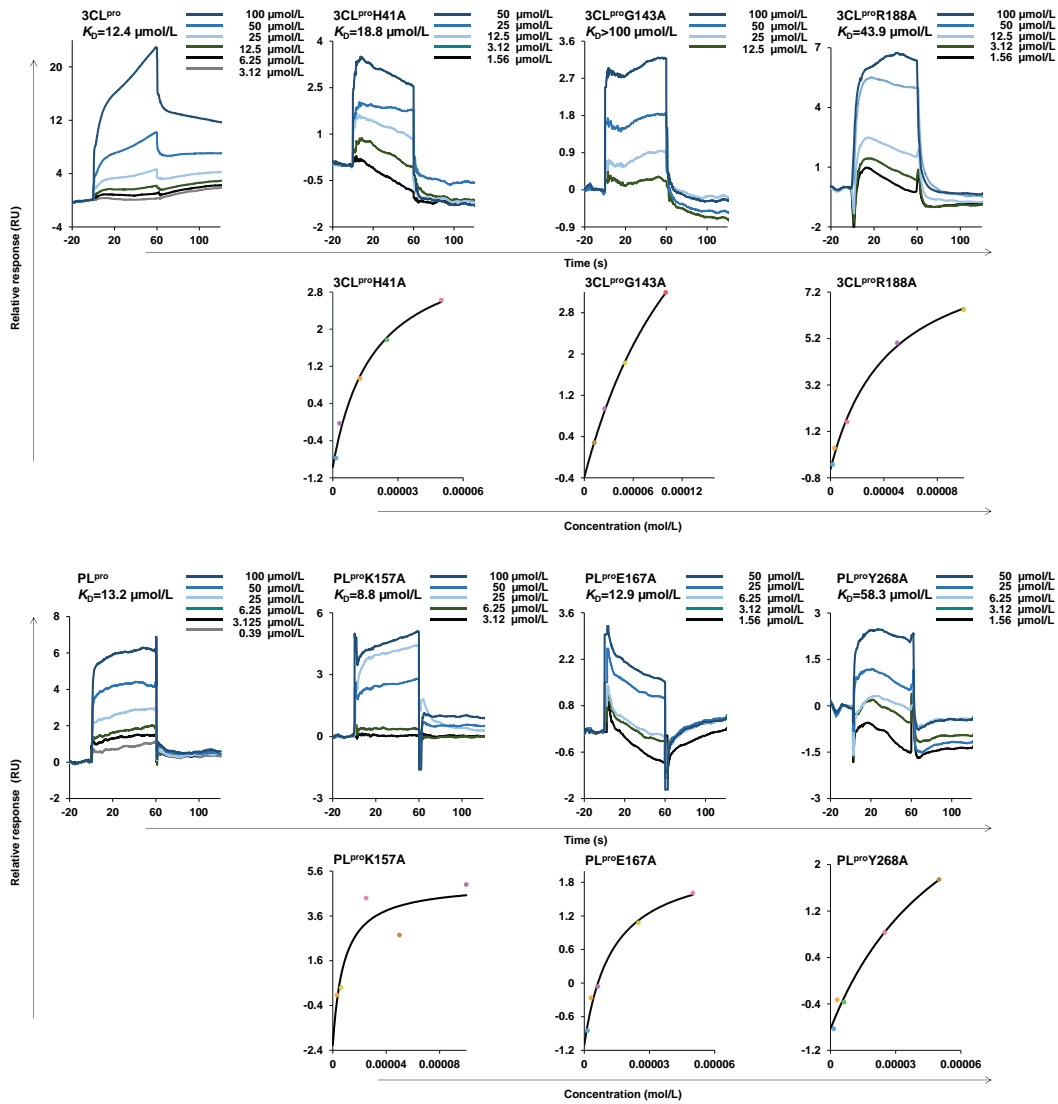

**Figure S6** Relative responses of schaftoside to 3CL<sup>pro</sup>, PL<sup>pro</sup>, and their mutants determined by surface plasmon resonance. The measurements were performed using Biacore 8K.

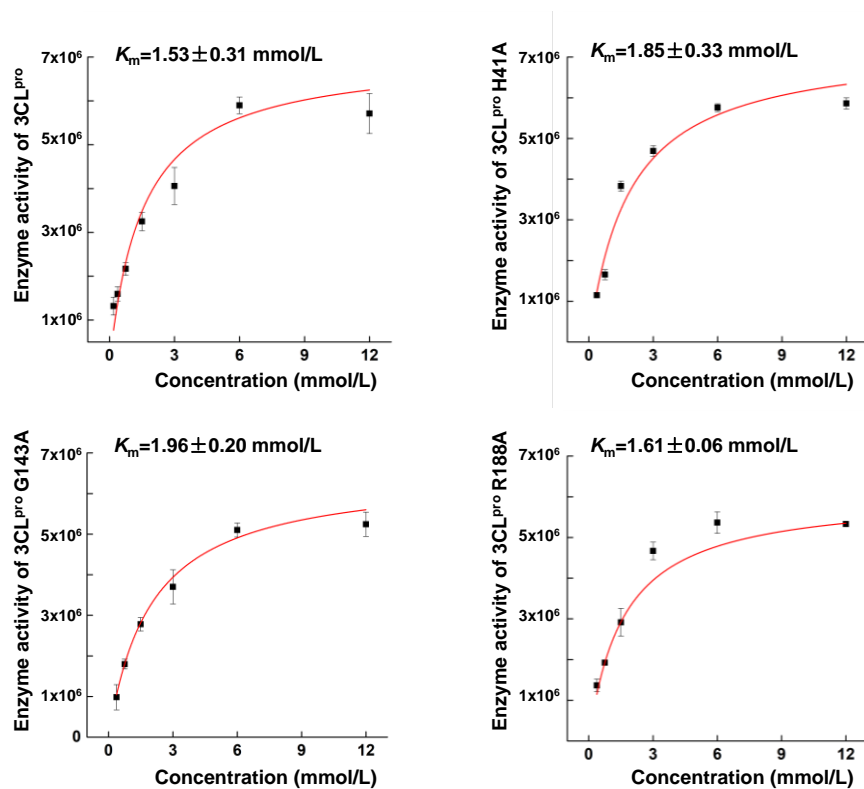

**Figure S7** Enzyme activities of 3CL<sup>pro</sup> and its mutants H41A, G143A, and R188A with 3CL<sup>pro</sup> substrate at concentrations of 0.37, 0.75, 1.50, 3, 6 and 12 mmol/L,  $n = 3$ . Unit of enzyme activity: pmol/μg/min.

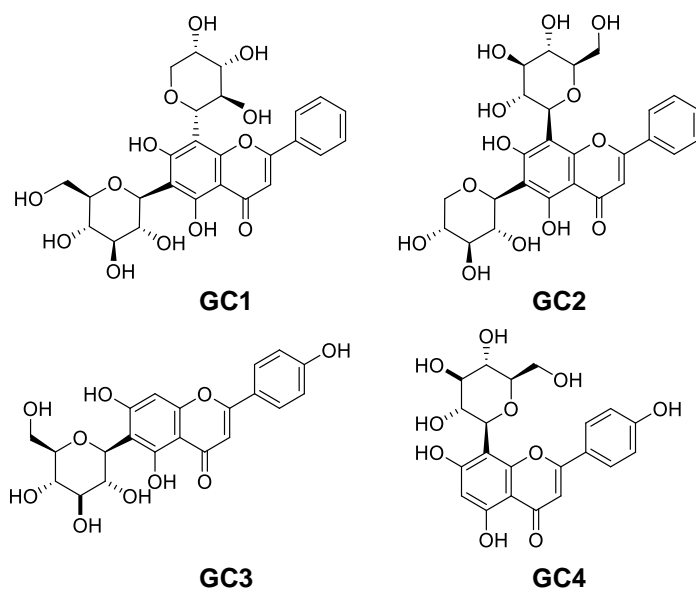

**Figure S8** Structures of schaftoside analogues (flavonoid C-glycosides).

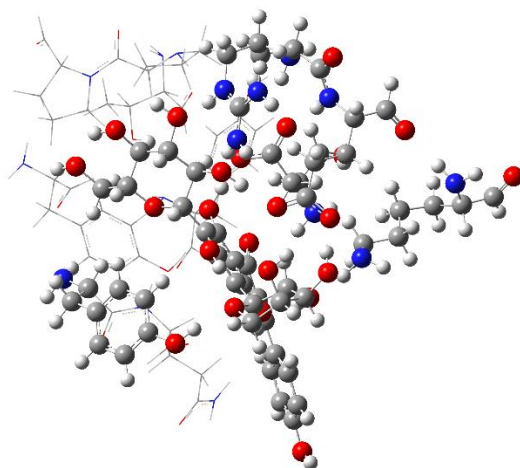

**Figure S9** Molecular structure of schaftoside and residues of PL<sup>pro</sup> determined by QM/MM calculations.

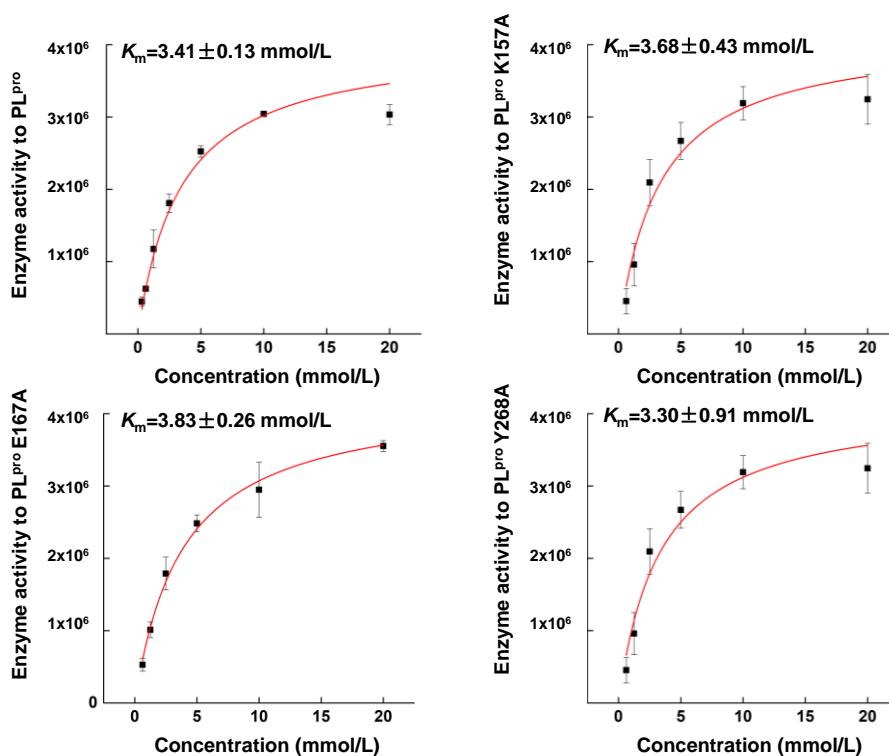

**Figure S10** Enzyme activities of PL<sup>pro</sup> and its mutants K157A, E167A, and Y268A with PL<sup>pro</sup> substrate at concentrations of 0.625, 1.25, 2.5, 5, 10 and 20 mmol/L,  $n = 3$ . Unit of enzyme activity: pmol/ $\mu$ g/min.



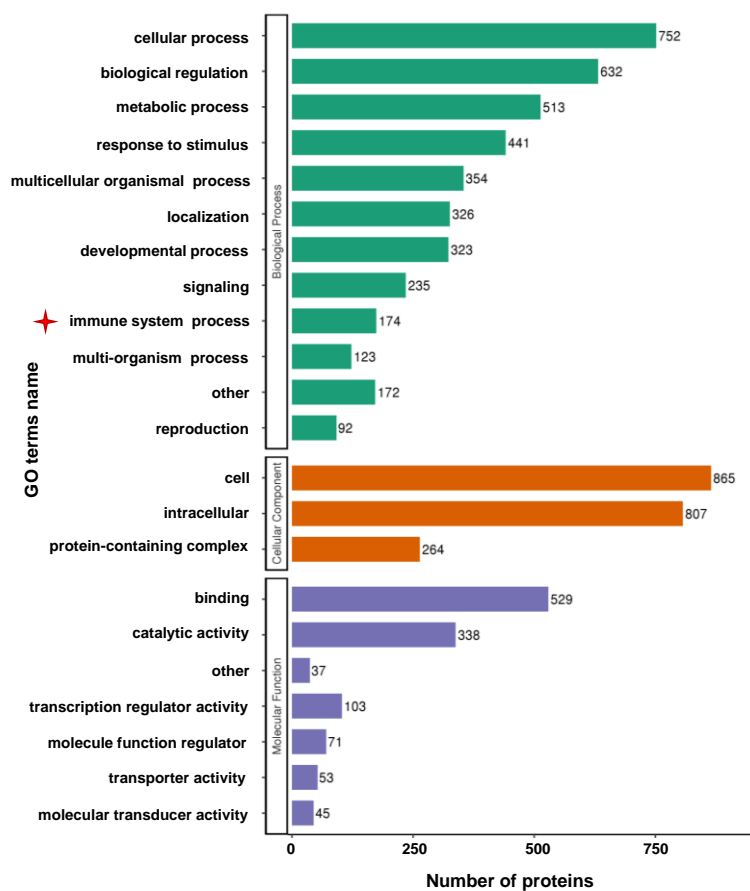

**Figure S11** A list of up-regulated proteins upon treatment of schaftoside, performed by Gene Ontology (GO) annotation.

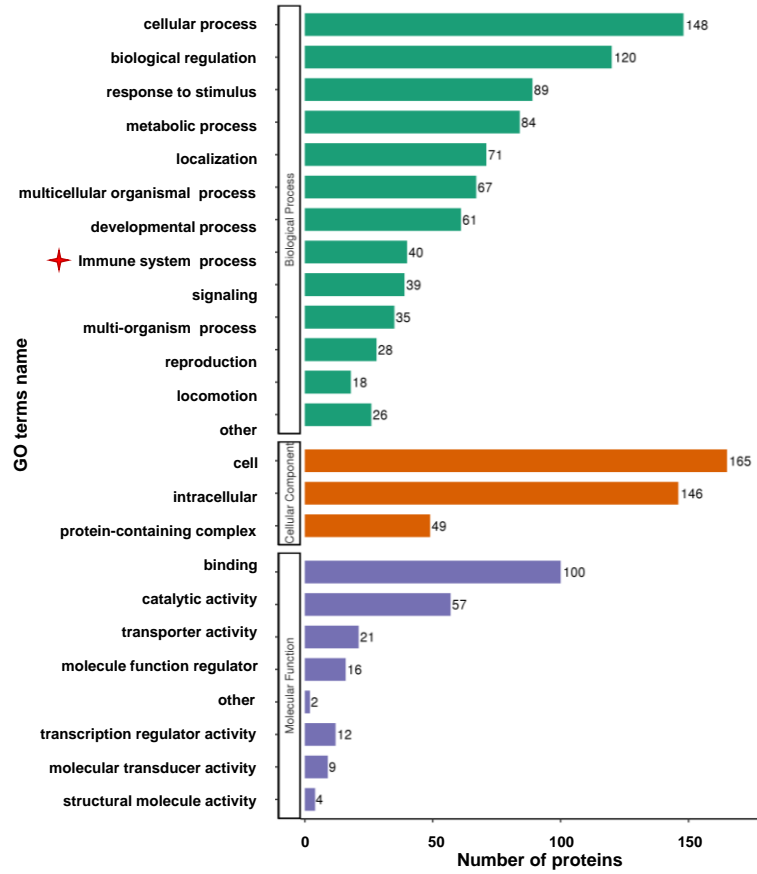

**Figure S12** A list of down-regulated proteins upon treatment of schaftoside, performed by Gene Ontology (GO) annotation.

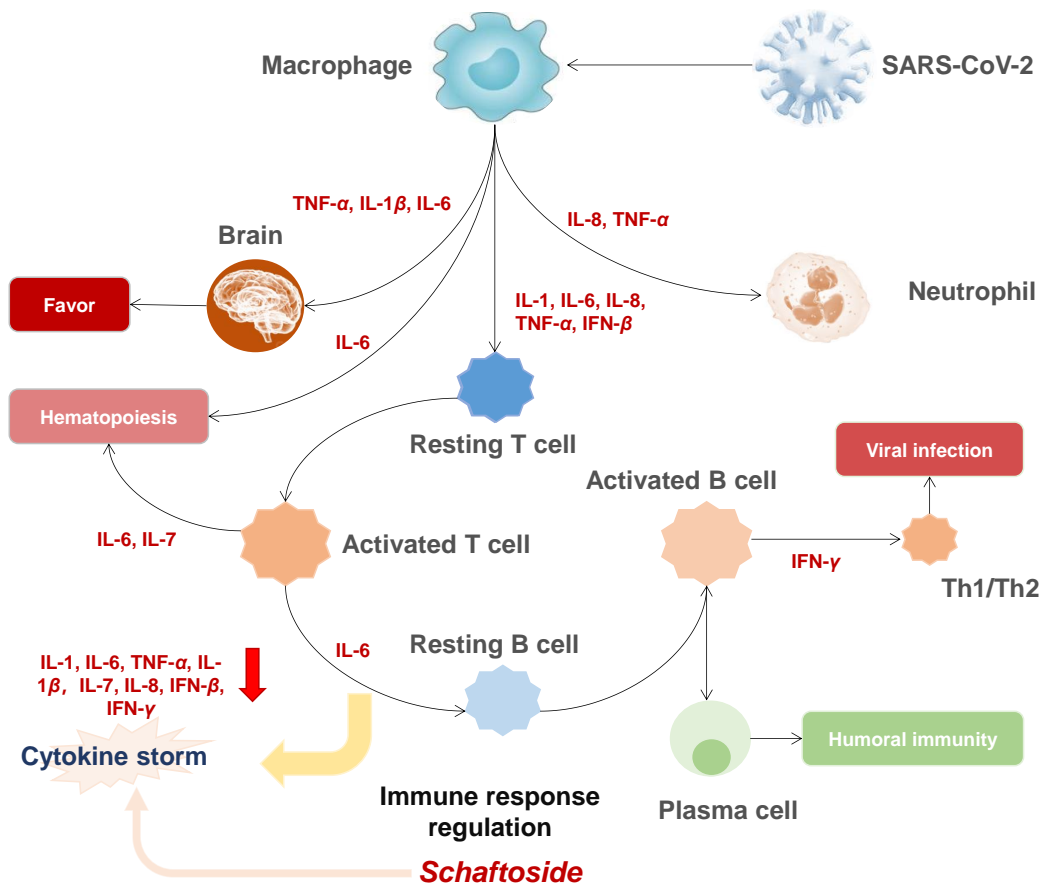

**Figure S13** Proposed mechanisms of schaftoside to regulate immune response and inflammation of host cells<sup>35-39</sup>.

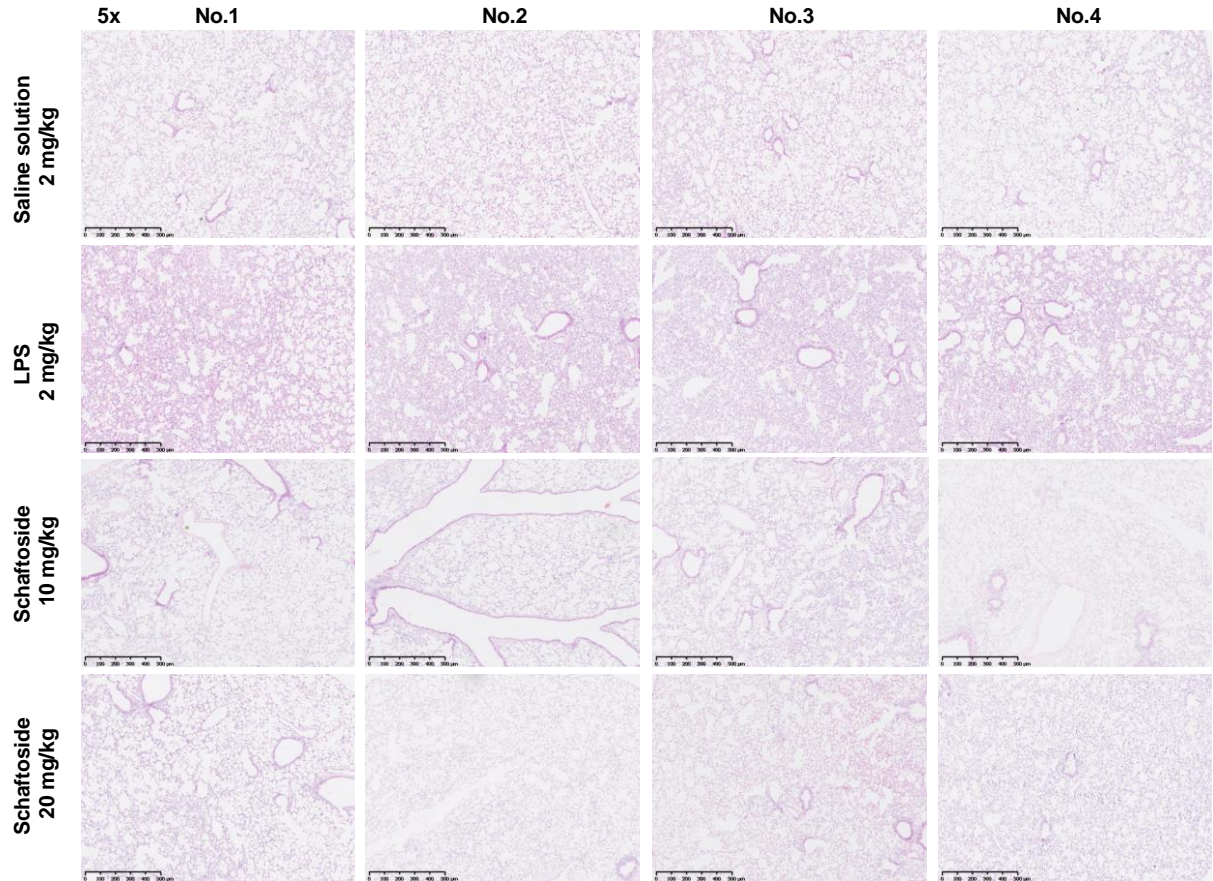

**Figure S14** Effects of schaftoside (10 and 20 mg/kg, *i.g.*) on histological changes in LPS-induced ALI mice ( $n = 4$ , scale bar = 500  $\mu\text{m}$ ). Representative images of mice lung tissue stained using HE after 8 h of LPS treatment.

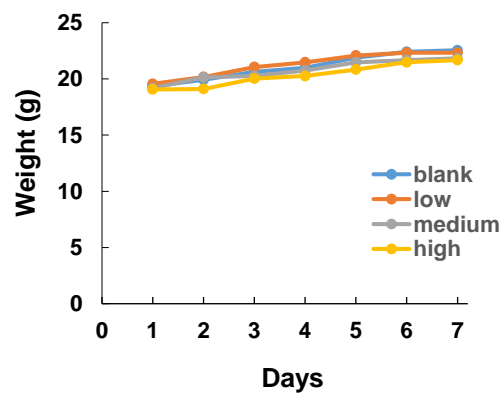

**Figure S15** Weight of male ICR mice after schaftoside treatment in 7 days,  $n = 5$ . Four groups were divided, including blank (saline solution), low dose group (20 mg/kg, *i.g.*), medium dose group (40 mg/kg, *i.g.*), and high dose group (300 mg/kg, *i.g.*).

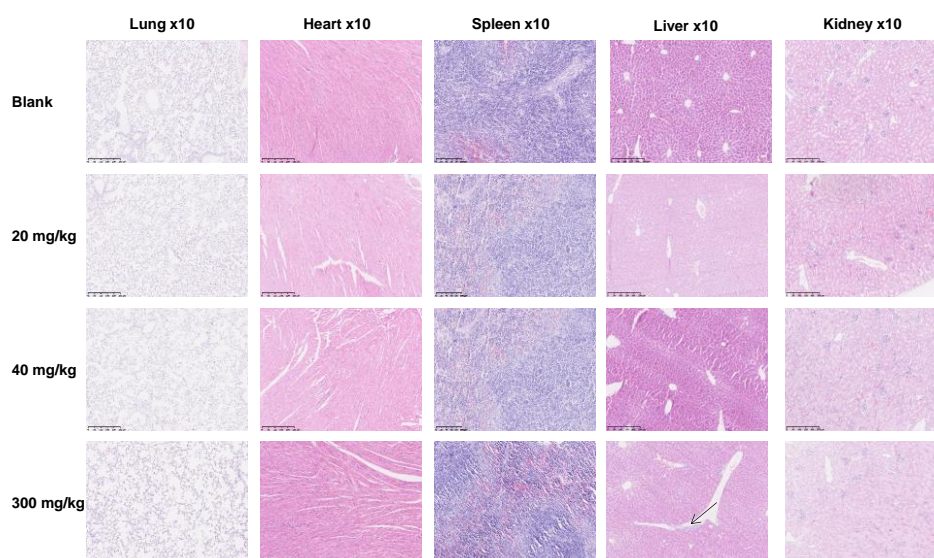

**Figure S16** Effects of schaftoside on histological changes in different dosing groups (20 mg/kg, 40 mg/kg, and 300 mg/kg, *i.g.*) of male ICR mice. Blank, saline solution.

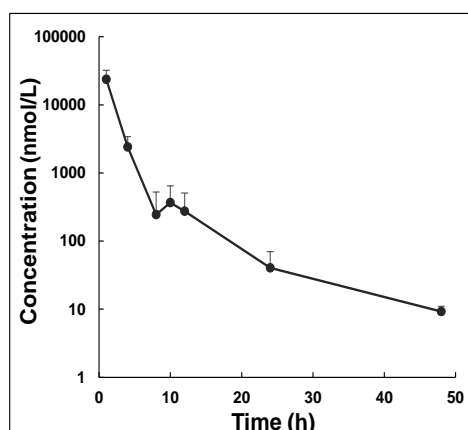

**Figure S17** Time-plasma concentration curves of schaftoside in mice after intraperitoneal injection of schaftoside (150 mg/kg, *i.p.*  $T_{max}$  = 1 h,  $AUC_{total}$  = 0.026 h·g/L,  $t_{1/2}$  = 7.5 h,  $n$  = 4).

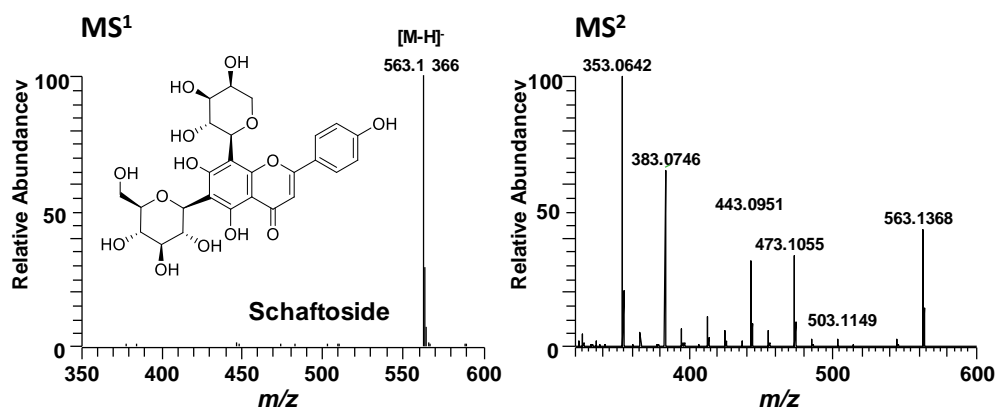

**Figure S18** High-resolution MS and MS/MS spectra of schaftoside in the negative ion mode acquired on a Thermo Scientific Q-Exactive mass spectrometer (ThermoFisher). Data were processed using Xcalibur 4.1 software (ThermoFisher).

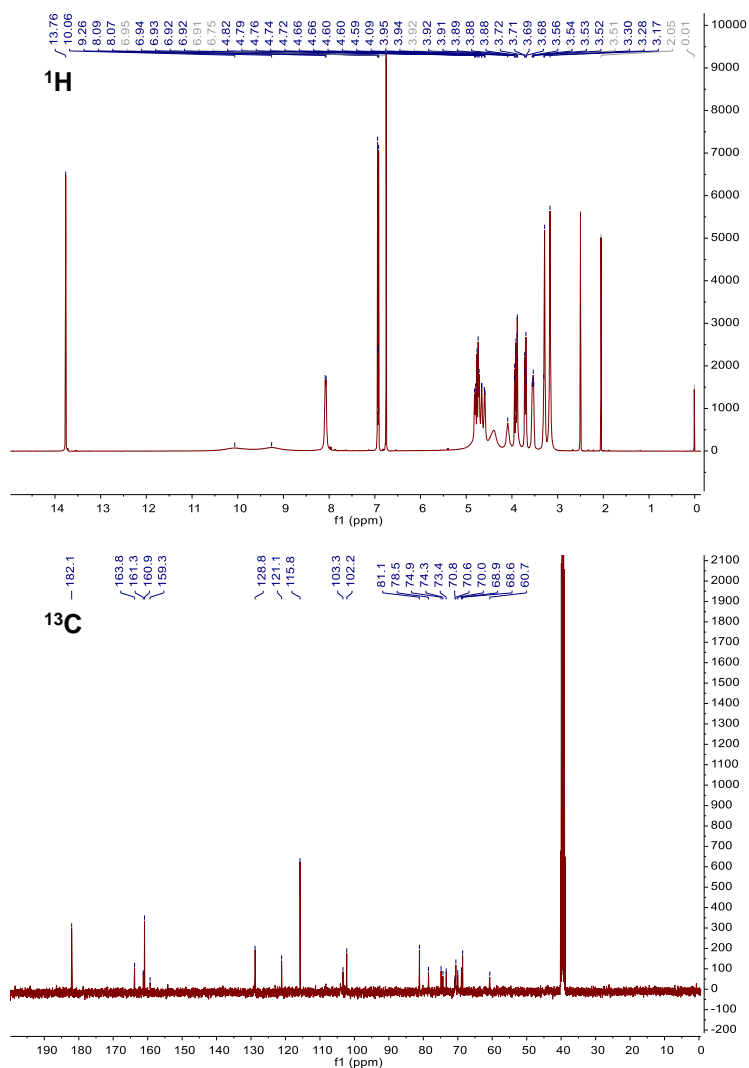

**Figure S19** The <sup>1</sup>H NMR (400 MHz) and <sup>13</sup>C NMR (100 MHz) spectra of schaftoside in DMSO-*d*<sub>6</sub> at 60 °C.

#### 4. Supporting tables

**Table S1** Primers for site-directed mutagenesis.

| Mutant                          | Sequence (5'→3')                                                               |
|---------------------------------|--------------------------------------------------------------------------------|
| <i>3CL<sup>pro</sup> H41A</i> , | CTGTCCAAGAG <b>GCA</b> GTGATCTGCACCTCTGAAG<br>TGCTCTTGGACAGTAAACTACGTCATCAAGCC |
| <i>3CL<sup>pro</sup> G143A</i>  | CATTCCTTAAT <b>GCA</b> TCATGTGGTAGTGTTG<br>TGCATTAAGGAATGAACCCTTAATAGTGAAAT    |
| <i>3CL<sup>pro</sup> R188A</i>  | CTTTTGTGAC <b>GCA</b> CAAACAGCACAAGCAG<br>TGCGTCAACAAAAGGTCCATAAAAAGTTACCT     |
| <i>PL<sup>pro</sup> K157A</i>   | CTGGCATATTGTAAT <b>GCA</b> ACCGTTGGTGAAC<br>GCATTACAATATGCCAGAATCAGTGCACA      |
| <i>PL<sup>pro</sup> E167A</i>   | CTGGGTGATGTGCGCG <b>CA</b> ACCATGTCATATC<br>GCGCGCACATCACCCAGTTCACCAACGGT      |
| <i>PL<sup>pro</sup> Y268A</i>   | GAATATACCGGTAAC <b>GCA</b> CAGTGCGGCCAT<br>TGC GTTACCGGTATATTCGCTTGCACAGGT     |

**Table S2** The inhibitory activities against SARS-CoV-2 virus 3CL<sup>pro</sup> of 12 traditional Chinese medicine herbs (50 µg/mL) and related single compounds (8 µmol/L).

| No. | Name                                                                     | Inhibition rate [%] |
|-----|--------------------------------------------------------------------------|---------------------|
| 1   | Isatidis Radix                                                           | 38.17               |
| 2   | Ephedrae Herba                                                           | 37.76               |
| 3   | Astragali Radix                                                          | 34.70               |
| 4   | Glycyrrhizae Radix et Rhizoma                                            | 32.85               |
| 5   | Lonicerae Flos                                                           | 25.47               |
| 6   | Scutellariae Radix                                                       | 24.81               |
| 7   | Forsythiae Fructus                                                       | 15.40               |
| 8   | Platycodonis Radix                                                       | 12.86               |
| 9   | Semen Armeniacae Amarum                                                  | 10.37               |
| 10  | Rhizoma Atractylodis Macrocephalae                                       | 7.78                |
| 11  | Herba Pogostemonis                                                       | 0.00                |
| 12  | Pericarpium Citri Reticulatae                                            | 0.00                |
| 13  | schaftoside ( <b>1</b> )                                                 | 75.90               |
| 14  | vicenin-2 ( <b>2</b> )                                                   | 76.53               |
| 15  | licoisoflavanone ( <b>3</b> )                                            | 66.86               |
| 16  | isoschaftoside ( <b>4</b> )                                              | 63.00               |
| 17  | alloicoflavone B ( <b>5</b> )                                            | 61.22               |
| 18  | isoviolanthin ( <b>6</b> )                                               | 37.84               |
| 19  | glycyfuranocoumarin B ( <b>7</b> )                                       | 27.67               |
| 20  | liquiritin apioside ( <b>8</b> )                                         | 27.35               |
| 21  | uralenol ( <b>9</b> )                                                    | 21.24               |
| 22  | glabridin ( <b>10</b> )                                                  | 17.43               |
| 23  | 5,7,4'-trihydroxy-3'(3-methylbut-2-enyl)-3-methoxy flavone ( <b>11</b> ) | 16.92               |
| 24  | isoglycoumarin ( <b>12</b> )                                             | 16.25               |
| 25  | licoisoflavone B ( <b>13</b> )                                           | 14.81               |
| 26  | glycyuralin E ( <b>14</b> )                                              | 13.61               |

|    |                                                            |       |
|----|------------------------------------------------------------|-------|
| 27 | 4',7-dihydroxyflavone 7- <i>O</i> -glucoside ( <b>15</b> ) | 12.51 |
| 28 | isoderrone ( <b>16</b> )                                   | 11.77 |
| 29 | glycyfuranocoumarone A ( <b>17</b> )                       | 5.90  |
| 30 | GC1                                                        | 46.12 |
| 31 | GC2                                                        | 41.93 |
| 32 | GC3                                                        | 38.81 |
| 33 | GC4                                                        | 15.27 |
| 34 | <b>GC376</b>                                               | 82.29 |

**GC376**, positive control.

**Table S3** The inhibitory activities against SARS-CoV-2 virus PL<sup>pro</sup> of 12 traditional Chinese medicine herbs (50 µg/mL) and related single compounds (8 µmol/L).

| No. | Name                                          | Inhibition rate [%] |
|-----|-----------------------------------------------|---------------------|
| 1   | Herba Pogostemonis                            | 43.76               |
| 2   | Glycyrrhizae Radix et Rhizoma                 | 40.93               |
| 3   | Lonicerae Flos                                | 38.45               |
| 4   | Ephedrae Herba                                | 32.63               |
| 5   | Platycodonis Radix                            | 35.71               |
| 6   | Isatidis Radix                                | 30.85               |
| 7   | Pericarpium Citri Reticulatae                 | 25.00               |
| 8   | Scutellariae Radix                            | 24.16               |
| 9   | Semen Armeniacae Amarum                       | 19.31               |
| 10  | Rhizoma Atractylodis Macrocephalae            | 13.41               |
| 11  | Forsythiae Fructus                            | 12.09               |
| 12  | Astragali Radix                               | 3.62                |
| 13  | schaftoside ( <b>1</b> )                      | 60.00               |
| 14  | isolicoflavonol ( <b>18</b> )                 | 59.93               |
| 15  | 7- <i>O</i> -methylluteone ( <b>19</b> )      | 54.30               |
| 16  | licoisoflavone A ( <b>20</b> )                | 45.50               |
| 17  | liquiritigenin-7,4'-diglucoside ( <b>21</b> ) | 42.76               |
| 18  | kumatakenin B ( <b>22</b> )                   | 39.16               |
| 19  | 1-methoxyphaseollin ( <b>23</b> )             | 34.95               |
| 20  | <b>GRL0617</b>                                | 84.75               |

**GRL0617**, positive control.

**Table S4** Binding affinity of 125 licorice compounds with SARS-CoV-2 3CL<sup>pro</sup> by molecular docking.

| No. | Name                 | Binding affinity [kcal/mol] |
|-----|----------------------|-----------------------------|
| 1   | vicenin-2            | -9.1                        |
| 2   | allolicoisoflavone B | -8.9                        |
| 3   | isoschaftoside       | -8.7                        |
| 4   | isoderrone           | -8.5                        |
| 5   | isoglycoumarin       | -8.5                        |



|    |                                                                                                        |      |
|----|--------------------------------------------------------------------------------------------------------|------|
| 6  | schaftoside                                                                                            | -8.4 |
| 7  | glycyfuranocoumarin B                                                                                  | -8.4 |
| 8  | liquiritin apioside                                                                                    | -8.4 |
| 9  | 5,7,4'-trihydroxy-3'(3-methylbut-2-enyl)-3-methoxy flavone(5,7,4'-tr-3'(3-m-2-enyl)-3-methoxy flavone) | -8.3 |
| 10 | isoviolanthin                                                                                          | -8.3 |
| 11 | licoisoflavanone                                                                                       | -8.3 |
| 12 | licoisoflavone B                                                                                       | -8.2 |
| 13 | uralenol                                                                                               | -8.2 |
| 14 | 4',7-dihydroxyflavone 7-O-glucoside                                                                    | -8.2 |
| 15 | glycyfuranocoumarin A                                                                                  | -8.1 |
| 16 | glycyuralin E                                                                                          | -8.1 |
| 17 | glabridin                                                                                              | -8.1 |
| 18 | semilicoisoflavone B                                                                                   | -8.0 |
| 19 | isoglycyrol                                                                                            | -8.0 |
| 20 | IAA                                                                                                    | -8.0 |
| 21 | 6,8-diprenylgenistein                                                                                  | -8.0 |
| 22 | isolicoflavonol                                                                                        | -8.0 |
| 23 | glycyfuranocoumarin C                                                                                  | -8.0 |
| 24 | isolupalbigenin                                                                                        | -8.3 |
| 25 | broussonol E                                                                                           | -8.0 |
| 26 | glycyrol                                                                                               | -8.0 |
| 27 | sophoraflavone B                                                                                       | -8.0 |
| 28 | daidzin                                                                                                | -7.9 |
| 29 | lupiwighteone                                                                                          | -7.9 |
| 30 | 1-methoxyphaseollin                                                                                    | -7.9 |
| 31 | apigenin 6-C-rha-8-C-[6'''-(3-hydroxy-3-methylglutaroyl) -glucoside]                                   | -7.8 |
| 32 | isoliquiritin apioside                                                                                 | -7.8 |
| 33 | neoliquiritin                                                                                          | -7.8 |
| 34 | glycyuralin C                                                                                          | -7.8 |
| 35 | topazolin                                                                                              | -7.8 |
| 36 | glycyuralin D                                                                                          | -7.8 |
| 37 | isoglabrone                                                                                            | -7.8 |
| 38 | licocoumarone                                                                                          | -7.8 |
| 39 | 6-C-prenylorobol                                                                                       | -7.8 |
| 40 | gancaonin L                                                                                            | -7.8 |
| 41 | licoflavone A                                                                                          | -7.8 |
| 42 | glycyuralin B                                                                                          | -7.7 |
| 43 | glycyroside                                                                                            | -7.6 |
| 44 | isoangustone A                                                                                         | -7.6 |
| 45 | dehydroglyasperin D                                                                                    | -7.6 |
| 46 | gancaonin I                                                                                            | -7.6 |
| 47 | licoisoflavone A                                                                                       | -7.6 |
| 48 | licoarylcoumarin                                                                                       | -7.6 |
| 49 | pratensein                                                                                             | -7.6 |
| 50 | dehydroglyasperin C                                                                                    | -7.6 |
| 51 | kaempferol                                                                                             | -7.6 |
| 52 | 2'-hydroxyisolupalbigenin                                                                              | -7.6 |
| 53 | glycyrin                                                                                               | -7.6 |

|     |                                                              |      |
|-----|--------------------------------------------------------------|------|
| 54  | glycyuralin A                                                | -7.5 |
| 55  | licoflavonol                                                 | -7.5 |
| 56  | glyrallin A                                                  | -7.5 |
| 57  | hirtellanine I                                               | -7.5 |
| 58  | glycyrrhiza-isoflavone C                                     | -7.5 |
| 59  | glycyuralin F                                                | -7.5 |
| 60  | liquiritin                                                   | -7.4 |
| 61  | neoisoliquiritin                                             | -7.4 |
| 62  | genkwanin                                                    | -7.4 |
| 63  | kumatakenin B                                                | -7.4 |
| 64  | luteone                                                      | -7.4 |
| 65  | licoricidin                                                  | -7.4 |
| 66  | 5,5',7-trihydroxy-2',2'-dimethyl-2'H,4H-3,8'-bichromen-4-one | -7.4 |
| 67  | glycycoumarin                                                | -7.3 |
| 68  | homobutein                                                   | -7.3 |
| 69  | licoalcone A                                                 | -7.3 |
| 70  | ononin                                                       | -7.2 |
| 71  | isoliquiritin                                                | -7.2 |
| 72  | angustone A                                                  | -7.2 |
| 73  | formononetin                                                 | -7.2 |
| 74  | wighteone                                                    | -7.1 |
| 75  | 3-O- $\beta$ -D-glucuronopyranosyl-glycyrrhetic acid         | -7.1 |
| 76  | 7-O-methyluteone                                             | -7.1 |
| 77  | licoricone                                                   | -7.1 |
| 78  | 7-methoxy-2',4'-dihydroxy isoflavone                         | -7.1 |
| 79  | 11b-hydroxy-11b,1-dihydromedicarpin                          | -7.1 |
| 80  | abiochanin A (Biochanin)                                     | -7.1 |
| 81  | 3-methoxy-9-hydroxy-pterocarpan                              | -7.1 |
| 82  | licorice-saponin B                                           | -7.0 |
| 83  | kaempferol-3-O-methyl ether                                  | -7.0 |
| 84  | isoliquiritigenin                                            | -7.0 |
| 85  | glyasperin C                                                 | -7.0 |
| 86  | liquiritigenin-7,4'-diglucoside                              | -6.9 |
| 87  | glucoliquiritin apioside                                     | -6.9 |
| 88  | glyasperin D                                                 | -6.9 |
| 89  | kumatakenin                                                  | -6.9 |
| 90  | genistein                                                    | -6.9 |
| 91  | daidzein                                                     | -6.9 |
| 92  | glycyrrhetic acid                                            | -6.8 |
| 93  | echinatin                                                    | -6.8 |
| 94  | syringic acid 4-O-glucopyranoside                            | -6.7 |
| 95  | glicoricone                                                  | -6.7 |
| 96  | glicophenone                                                 | -6.7 |
| 97  | uralsaponin P                                                | -6.6 |
| 98  | isoliquiritigenin-4,4'-diglucoside                           | -6.5 |
| 99  | licorice-saponin A3                                          | -6.5 |
| 100 | liquiritigenin                                               | -6.4 |
| 101 | licorice-saponin J2                                          | -6.0 |
| 102 | uralsaponin N                                                | -5.9 |

|     |                                                                                                                 |      |
|-----|-----------------------------------------------------------------------------------------------------------------|------|
| 103 | uralsaponin W                                                                                                   | -5.7 |
| 104 | uralsaponin C                                                                                                   | -5.6 |
| 105 | uralsaponin Y                                                                                                   | -5.6 |
| 106 | licorice-saponin B2                                                                                             | -5.6 |
| 107 | glycyrrhizic acid                                                                                               | -5.5 |
| 108 | licorice-saponin H2                                                                                             | -5.5 |
| 109 | araboglycyrrhizin                                                                                               | -5.5 |
| 110 | uralsaponin Q                                                                                                   | -5.3 |
| 111 | uralsaponin V                                                                                                   | -5.3 |
| 112 | uralsaponin T                                                                                                   | -5.1 |
| 113 | 3 $\beta$ -O- $\beta$ -D-glucuronosyl-(1 $\rightarrow$ 2)- $\beta$ -D-glucuronosyl-olean-9,12-diene-30-oic-acid | -5.1 |
| 114 | licorice-saponin G2                                                                                             | -4.8 |
| 115 | uralsaponin U                                                                                                   | -4.8 |
| 116 | 22 $\beta$ -acetoxyl-glycyrrhaldehyde                                                                           | -4.3 |
| 117 | 2-one-4-methoxy-pyran                                                                                           | -4.3 |
| 118 | 22 $\beta$ -acetoxylglycyrrhizin                                                                                | -4.2 |
| 119 | uralsaponin M                                                                                                   | -4.2 |
| 120 | licorice-saponin E2                                                                                             | -3.7 |
| 121 | uralsaponin O                                                                                                   | -3.7 |
| 122 | uralsaponin R                                                                                                   | -3.4 |
| 123 | uralsaponin S                                                                                                   | -3.4 |
| 124 | uralsaponin F                                                                                                   | -3.2 |
| 125 | uralsaponin X                                                                                                   | -2.1 |

**Table S5** Binding affinity of 125 licorice compounds with SARS-CoV-2 PL<sup>pro</sup> by molecular docking.

| No. | Name                                | Binding affinity [kcal/mol] |
|-----|-------------------------------------|-----------------------------|
| 1   | liquiritigenin-7,4'-diglucoside     | -8.5                        |
| 2   | schaftoside                         | -8.5                        |
| 3   | licoisoflavone A                    | -8.3                        |
| 4   | isolicoflavonol                     | -8.3                        |
| 5   | 1-methoxyphaseollin                 | -8.3                        |
| 6   | 7-O-methyluteone                    | -8.1                        |
| 7   | kumatakenin B                       | -8.1                        |
| 8   | glycycomarin                        | -8.0                        |
| 9   | glycyfuranocoumarin C               | -8.0                        |
| 10  | licoflavonol                        | -8.0                        |
| 11  | isolupalbigenin                     | -8.0                        |
| 12  | broussonol E                        | -8.0                        |
| 13  | licoflavone A                       | -8.0                        |
| 14  | topazolin                           | -8.0                        |
| 15  | licoalcone A                        | -8.0                        |
| 16  | glycyroside                         | -7.9                        |
| 17  | 4',7-dihydroxyflavone 7-O-glucoside | -7.9                        |
| 18  | licoisoflavanone                    | -7.9                        |
| 19  | semilicoisoflavone B                | -7.9                        |
| 20  | uralenol                            | -7.9                        |

|    |                                                                                                            |      |
|----|------------------------------------------------------------------------------------------------------------|------|
| 21 | homobutein                                                                                                 | -7.9 |
| 22 | angustone A                                                                                                | -7.8 |
| 23 | genkwanin                                                                                                  | -7.8 |
| 24 | isoliquiritigenin                                                                                          | -7.8 |
| 25 | liquiritigenin                                                                                             | -7.8 |
| 26 | isoderrone                                                                                                 | -7.8 |
| 27 | apigenin 6-C-rha-8-C-[6'''-(3-hydroxy-3-methylglutaroyl)-<br>glucopyranoside]                              | -7.7 |
| 28 | daidzin                                                                                                    | -7.7 |
| 29 | glycyuralin A                                                                                              | -7.7 |
| 30 | glycyuralin C                                                                                              | -7.7 |
| 31 | luteone                                                                                                    | -7.7 |
| 32 | isoviolanthin                                                                                              | -7.6 |
| 33 | liquiritin                                                                                                 | -7.6 |
| 34 | neoliquiritin                                                                                              | -7.6 |
| 35 | IAA                                                                                                        | -7.6 |
| 36 | isoglycyrol                                                                                                | -7.6 |
| 37 | wighteone                                                                                                  | -7.6 |
| 38 | allolicoisoflavone B                                                                                       | -7.6 |
| 39 | glabridin                                                                                                  | -7.6 |
| 40 | licoricidin                                                                                                | -7.6 |
| 41 | glycyrin                                                                                                   | -7.6 |
| 42 | isoliquiritin apioside                                                                                     | -7.5 |
| 43 | isoliquiritin                                                                                              | -7.5 |
| 44 | glycyrrhetic acid                                                                                          | -7.5 |
| 45 | 5,5',7-trihydroxy-2',2'-dimethyl-2'H,4H-3,8'-bichromen-4-one                                               | -7.5 |
| 46 | glycyrol                                                                                                   | -7.5 |
| 47 | gancaonin I                                                                                                | -7.5 |
| 48 | echinatin                                                                                                  | -7.5 |
| 49 | glycyuralin F                                                                                              | -7.5 |
| 50 | 2'-hydroxyisolupalbigenin                                                                                  | -7.5 |
| 51 | isoschaftoside                                                                                             | -7.4 |
| 52 | neoisoliquiritin                                                                                           | -7.4 |
| 53 | sophoraflavone B                                                                                           | -7.4 |
| 54 | glycyfuranocoumarone A                                                                                     | -7.4 |
| 55 | glyrallin A                                                                                                | -7.4 |
| 56 | licocoumarone                                                                                              | -7.4 |
| 57 | 6-C-prenylorobol                                                                                           | -7.4 |
| 58 | licorice-saponin B                                                                                         | -7.3 |
| 59 | glyasperin D                                                                                               | -7.3 |
| 60 | dehydroglyasperin D                                                                                        | -7.3 |
| 61 | dehydroglyasperin C                                                                                        | -7.3 |
| 62 | isoliquiritigenin-4,4'-diglucoside                                                                         | -7.2 |
| 63 | liquiritin apioside                                                                                        | -7.2 |
| 64 | 5,7,4'-trihydroxy-3'(3-methylbut-2-enyl)-3-methoxy flavone<br>(5,7,4'-tr-3'(3-m-2-enyl)-3-methoxy flavone) | -7.2 |
| 65 | isoglabrone                                                                                                | -7.2 |
| 66 | 11b-hydroxy-11b,1-dihydromedicarpin                                                                        | -7.2 |
| 67 | glicoricone                                                                                                | -7.2 |
| 68 | glyasperin C                                                                                               | -7.2 |

|     |                                                                                                                                        |      |
|-----|----------------------------------------------------------------------------------------------------------------------------------------|------|
| 69  | 6,8-diprenylgenistein                                                                                                                  | -7.2 |
| 70  | ononin                                                                                                                                 | -7.1 |
| 71  | licorice-saponin J2                                                                                                                    | -7.1 |
| 72  | uralsaponin V                                                                                                                          | -7.1 |
| 73  | glycyuralin B                                                                                                                          | -7.1 |
| 74  | lupiwighteone                                                                                                                          | -7.1 |
| 75  | glycyuralin E                                                                                                                          | -7.1 |
| 76  | licorice-saponin E2                                                                                                                    | -7.0 |
| 77  | uralsaponin O                                                                                                                          | -7.0 |
| 78  | glycyrrhizic acid                                                                                                                      | -7.0 |
| 79  | isoglycycomarin                                                                                                                        | -7.0 |
| 80  | glycyfuranocoumarin B                                                                                                                  | -7.0 |
| 81  | pratensein                                                                                                                             | -7.0 |
| 82  | gancaonin L                                                                                                                            | -7.0 |
| 83  | 3-methoxy-9-hydroxy-pterocarpan                                                                                                        | -7.0 |
| 84  | glicophenone                                                                                                                           | -7.0 |
| 85  | licoisoflavone B                                                                                                                       | -7.0 |
| 86  | syringic acid 4- <i>O</i> -glucopyranoside                                                                                             | -6.9 |
| 87  | uralsaponin C                                                                                                                          | -6.9 |
| 88  | licorice-saponin G2                                                                                                                    | -6.9 |
| 89  | uralsaponin U                                                                                                                          | -6.9 |
| 90  | glycyuralin D                                                                                                                          | -6.9 |
| 91  | kaempferol-3- <i>O</i> -methyl ether                                                                                                   | -6.9 |
| 92  | glycyrrhiza-isoflavone C                                                                                                               | -6.9 |
| 93  | abiochanin A (Biochanin)                                                                                                               | -6.9 |
| 94  | glycyfuranocoumarin A                                                                                                                  | -6.8 |
| 95  | 7-methoxy-2',4'-dihydroxy isoflavone                                                                                                   | -6.8 |
| 96  | glucoliguiritin apioside                                                                                                               | -6.7 |
| 97  | uralsaponin N                                                                                                                          | -6.7 |
| 98  | licorice-saponin H2                                                                                                                    | -6.7 |
| 99  | araboglycyrrhizin                                                                                                                      | -6.7 |
| 100 | 3 $\beta$ - <i>O</i> -[ $\beta$ -D-glucuronopyranosyl-(1 $\rightarrow$ 2)- $\beta$ -D-glucuronopyranosyl]-olean-9,12-diene-30-oic-acid | -6.7 |
| 101 | uralsaponin W                                                                                                                          | -6.7 |
| 102 | formononetin                                                                                                                           | -6.7 |
| 103 | genistein                                                                                                                              | -6.7 |
| 104 | kaempferol                                                                                                                             | -6.7 |
| 105 | daidzein                                                                                                                               | -6.7 |
| 106 | vicenin-2                                                                                                                              | -6.5 |
| 107 | kumatakenin                                                                                                                            | -6.5 |
| 108 | licoarylcoumarin                                                                                                                       | -6.5 |
| 109 | licorice-saponin A3                                                                                                                    | -6.4 |
| 110 | uralsaponin Y                                                                                                                          | -6.4 |
| 111 | 3- <i>O</i> - $\beta$ -D-glucuronopyranosyl-glycyrrhetic acid                                                                          | -6.0 |
| 112 | licoricone                                                                                                                             | -5.9 |
| 113 | Hirtellanine I                                                                                                                         | -5.9 |
| 114 | uralsaponin T                                                                                                                          | -5.8 |
| 115 | uralsaponin P                                                                                                                          | -5.8 |
| 116 | uralsaponin R                                                                                                                          | -5.7 |
| 117 | uralsaponin S                                                                                                                          | -5.7 |

|     |                                       |      |
|-----|---------------------------------------|------|
| 118 | licorice-saponin B2                   | -5.7 |
| 119 | 22 $\beta$ -acetoxylglycyrrhizin      | -5.5 |
| 120 | uralsaponin M                         | -5.5 |
| 121 | uralsaponin F                         | -5.4 |
| 122 | 22 $\beta$ -acetoxyl-glycyrrhaldehyde | -5.4 |
| 123 | uralsaponin Q                         | -4.9 |
| 124 | 2-one-4-methoxy-pyran                 | -4.6 |
| 125 | uralsaponin X                         | -4.4 |

**Table S6** Crystallographic data collection and refinement statistics.

| Crystallographic data                             | 3CL <sup>pro</sup>    |
|---------------------------------------------------|-----------------------|
| space group                                       | <i>I</i> 121          |
| <i>a</i> , <i>b</i> , <i>c</i> (Å)                | 44.7, 53.5, 113.5     |
| $\alpha$ , $\beta$ , $\gamma$ (°)                 | 90.0, 101.2, 90.0     |
| resolution (Å)                                    | 13.09-2.08(2.14-2.08) |
| No. of measured reflections                       | 104103 (8669)         |
| No. of unique reflections                         | 15801 (1298)          |
| completeness (%)                                  | 99.2 (98.8)           |
| multiplicity                                      | 6.6 (6.7)             |
| $\langle I/d(I) \rangle$                          | 15.7 (3.2)            |
| $R_{\text{merge}}$ (%)                            | 8.5 (48.2)            |
| $R_{\text{work}}$ (%)                             | 21.2                  |
| $R_{\text{free}}$ (%)                             | 29.2                  |
| Rmsd bond lengths (Å)                             | 0.01                  |
| Rmsd bond angles (°)                              | 0.94                  |
| B-factors                                         | 21.8                  |
| Ramachandran plot residues in favored regions (%) | 96.27                 |
| PDB ID                                            | 7V7M                  |

**Table S7** Proteins related with immune response and inflammation determined by GO enrichment.

| No. | GO Terms       | Description         | Fold Enrichment | Fisher's exact test <i>P</i> value | Protein accession | Protein description                                                                                              | Gene name                                            | sch/ck Ratio |
|-----|----------------|---------------------|-----------------|------------------------------------|-------------------|------------------------------------------------------------------------------------------------------------------|------------------------------------------------------|--------------|
| 1   | down-regulated | leukocyte migration | 4.34            | 4.04276E-05                        | A0A0D9R9X4        | Fibronectin OS=Chlorocebus sabaesus OX=60711 GN=FN1 PE=4 SV=1                                                    | Fibronectin 1 ( <i>FNI</i> )                         | 0.633        |
| 2   |                |                     | 4.34            | 4.04276E-05                        | A0A0D9S645        | Lymphocyte function-associated antigen 3 isoform 1(predicted) OS=Chlorocebus sabaesus OX=60711 GN=CD58 PE=4 SV=1 | CD58 Molecule ( <i>CD58</i> )                        | 0.766        |
| 3   |                |                     | 4.34            | 4.04276E-05                        | A0A0D9QZF5        | CD44 antigen OS=Chlorocebus sabaesus OX=60711 GN=CD44 PE=4 SV=1                                                  | CD44 Molecule ( <i>CD44</i> )                        | 0.755        |
| 4   |                |                     | 4.34            | 4.04276E-05                        | A0A0D9S0W4        | Cystine/glutamate transporter(predicted) OS=Chlorocebus sabaesus OX=60711 GN=SLC7A11 PE=3 SV=1                   | Solute Carrier Family 7 Member 11 ( <i>SLC7A11</i> ) | 0.655        |
| 5   |                |                     | 4.34            | 4.04276E-05                        | A0A0D9S1V7        | ZnMc domain-containing protein OS=Chlorocebus sabaesus OX=60711 GN=MMP1 PE=3 SV=1                                | Matrix Metalloproteinase 1 ( <i>MMP1</i> )           | 0.581        |
| 6   |                |                     | 4.34            | 4.04276E-05                        | A0A0D9R354        | Solute carrier family 3 member 2 OS=Chlorocebus sabaesus OX=60711 GN=SLC3A2 PE=4 SV=1                            | Solute Carrier Family 3 Member 2 ( <i>SLC3A2</i> )   | 0.575        |
| 7   |                |                     | 4.34            | 4.04276E-05                        | A0A0D9R3G8        | Neural cell adhesion molecule L1 isoform 1(predicted) OS=Chlorocebus sabaesus OX=60711 GN=L1CAM PE=3 SV=1        | L1 Cell Adhesion Molecule ( <i>L1CAM</i> )           | 0.767        |
| 8   |                |                     | 4.34            | 4.04276E-05                        | A0A0D9R703        | Vitellogenin domain-containing protein OS=Chlorocebus sabaesus OX=60711 GN=APOB PE=4 SV=1                        | Apolipoprotein B ( <i>APOB</i> )                     | 0.556        |
| 9   |                |                     | 4.34            | 4.04276E-05                        | A0A0D9REC3        | Tyrosine-protein phosphatase non-receptor type substrate 1(predicted) OS=Chlorocebus sabaesus OX=60711 PE=4 SV=1 | —                                                    | 0.707        |

|    |                              |      |             |            |                                                                                                                       |                                                      |       |
|----|------------------------------|------|-------------|------------|-----------------------------------------------------------------------------------------------------------------------|------------------------------------------------------|-------|
| 10 |                              | 4.34 | 4.04276E-05 | A0A0D9S232 | Large neutral amino acids transporter small subunit 1(predicted) OS=Chlorocebus sabaesus OX=60711 GN=SLC7A5 PE=3 SV=1 | Solute Carrier Family 7 Member 5 ( <i>SLC7A5</i> )   | 0.6   |
| 11 |                              | 4.34 | 4.04276E-05 | A0A0D9QUZ5 | Integrin beta OS=Chlorocebus sabaesus OX=60711 PE=3 SV=1                                                              | –                                                    | 0.6   |
| 12 | neutrophil mediated immunity | 1.79 | 8.05358E-06 | A0A0D9R6H0 | Maltase-glucoamylase, intestinal(predicted) OS=Chlorocebus sabaesus OX=60711 GN=MGAM PE=3 SV=1                        | Maltase-Glucoamylase ( <i>MGAM</i> )                 | 2.445 |
| 13 | up-regulated                 | 1.79 | 8.05358E-06 | A0A0D9RI88 | Ribonuclease T2(predicted) OS=Chlorocebus sabaesus OX=60711 PE=3 SV=1                                                 | –                                                    | 1.829 |
| 14 |                              | 1.79 | 8.05358E-06 | A0A0D9RK06 | Phospholipase OS=Chlorocebus sabaesus OX=60711 GN=PLD1 PE=3 SV=1                                                      | Phospholipase D1 ( <i>PLD1</i> )                     | 1.575 |
| 15 |                              | 1.79 | 8.05358E-06 | A0A0D9RWL1 | Cathepsin B OS=Chlorocebus sabaesus OX=60711 GN=CTSB PE=3 SV=1                                                        | Cathepsin B ( <i>CTSB</i> )                          | 1.452 |
| 16 |                              | 1.79 | 8.05358E-06 | A0A0D9RCE1 | Isocitrate dehydrogenase [NADP] OS=Chlorocebus sabaesus OX=60711 GN=IDH1 PE=3 SV=1                                    | Isocitrate Dehydrogenase (NADP(+)) 1 ( <i>IDH1</i> ) | 1.455 |
| 17 |                              | 1.79 | 8.05358E-06 | A0A0D9RC57 | CUE domain-containing protein OS=Chlorocebus sabaesus OX=60711 GN=TOLLIP PE=3 SV=1                                    | Toll Interacting Protein ( <i>TOLLIP</i> )           | 1.434 |
| 18 |                              | 1.79 | 8.05358E-06 | A0A0D9R8S1 | Aldehyde dehydrogenase OS=Chlorocebus sabaesus OX=60711 PE=3 SV=1                                                     | –                                                    | 1.367 |
| 19 |                              | 1.79 | 8.05358E-06 | A0A0D9S0V3 | Granulins(predicted) OS=Chlorocebus sabaesus OX=60711 GN=GRN PE=3 SV=1                                                | Granulin Precursor ( <i>GRN</i> )                    | 2.532 |
| 20 |                              | 1.79 | 8.05358E-06 | A0A0D9RPV3 | Syntenin-1 isoform 3(predicted) OS=Chlorocebus sabaesus OX=60711 PE=4 SV=1                                            | –                                                    | 1.537 |
| 21 |                              | 1.79 | 8.05358E-06 | A0A0D9RZ27 | NHL repeat-containing protein 3(predicted) OS=Chlorocebus sabaesus OX=60711                                           | NHL Repeat Containing 3                              | 1.352 |



|    |      |             |            |                                                                                                   |                                                                                                      |       |
|----|------|-------------|------------|---------------------------------------------------------------------------------------------------|------------------------------------------------------------------------------------------------------|-------|
| 22 | 1.79 | 8.05358E-06 | A0A0D9QVL6 | GN=NHLRC3 PE=4 SV=1<br>Beta-mannosidase OS=Chlorocebus sabaenus<br>OX=60711 GN=MANBA PE=3 SV=1    | ( <i>NHLRC3</i> )<br>Mannosidase Beta<br>( <i>MANBA</i> )                                            | 1.426 |
| 23 | 1.79 | 8.05358E-06 | A0A0D9S3B0 | SGNH_hydro domain-containing protein<br>OS=Chlorocebus sabaenus OX=60711<br>GN=PAFAH1B2 PE=4 SV=1 | Platelet<br>Activating Factor<br>Acetylhydrolase<br>1b Catalytic<br>Subunit 2<br>( <i>PAFAH1B2</i> ) | 1.36  |
| 24 | 1.79 | 8.05358E-06 | A0A0D9RST9 | Cathepsin X OS=Chlorocebus sabaenus<br>OX=60711 GN=CTSZ PE=3 SV=1                                 | Cathepsin Z<br>( <i>CTSZ</i> )                                                                       | 1.304 |
| 25 | 1.79 | 8.05358E-06 | A0A0D9R7Z3 | Prosaposin OS=Chlorocebus sabaenus OX=60711<br>GN=PSAP PE=4 SV=1                                  | Prosaposin<br>( <i>PSAP</i> )                                                                        | 1.511 |
| 26 | 1.79 | 8.05358E-06 | A0A0D9RRW7 | Sulfatase domain-containing protein<br>OS=Chlorocebus sabaenus OX=60711<br>GN=ARSB PE=3 SV=1      | Arylsulfatase B<br>( <i>ARSB</i> )                                                                   | 2.106 |
| 27 | 1.79 | 8.05358E-06 | A0A0D9QZJ6 | COMM domain-containing protein<br>OS=Chlorocebus sabaenus OX=60711<br>GN=COMMD9 PE=4 SV=1         | COMM Domain<br>Containing 9<br>( <i>COMMD9</i> )                                                     | 1.308 |
| 28 | 1.79 | 8.05358E-06 | A0A0D9REY5 | GM2 ganglioside activator OS=Chlorocebus<br>sabaenus OX=60711 GN=GM2A PE=4 SV=1                   | GM2 Ganglioside<br>Activator ( <i>GM2A</i> )                                                         | 1.906 |
| 29 | 1.79 | 8.05358E-06 | A0A0D9RVU7 | CN hydrolase domain-containing protein<br>OS=Chlorocebus sabaenus OX=60711<br>GN=VNN1 PE=3 SV=1   | Vanin 1 ( <i>VNN1</i> )                                                                              | 5.144 |
| 30 | 1.79 | 8.05358E-06 | A0A0D9S4B2 | P-type domain-containing protein<br>OS=Chlorocebus sabaenus OX=60711 GN=GAA<br>PE=3 SV=1          | Alpha<br>Glucosidase<br>( <i>GAA</i> )                                                               | 1.591 |
| 31 | 1.79 | 8.05358E-06 | A0A0D9RSR2 | Grancalcin(predicted) OS=Chlorocebus sabaenus<br>OX=60711 GN=GCA PE=4 SV=1                        | Grancalcin ( <i>GCA</i> )                                                                            | 1.338 |
| 32 | 1.79 | 8.05358E-06 | A0A0D9R149 | Nitrilase family member 2 OS=Chlorocebus                                                          | Nitrilase Family                                                                                     | 1.39  |

|    |                                          |      |             |            |                                                                                                                                               |                                                                           |       |
|----|------------------------------------------|------|-------------|------------|-----------------------------------------------------------------------------------------------------------------------------------------------|---------------------------------------------------------------------------|-------|
| 33 |                                          | 1.79 | 8.05358E-06 | A0A0D9RVB6 | sabaeus OX=60711 GN=NIT2 PE=4 SV=1<br>Dipeptidyl peptidase 2 preproprotein(predicted)<br>OS=Chlorocebus sabaeus OX=60711 GN=DPP7<br>PE=3 SV=1 | Member 2 ( <i>NIT2</i> )<br>Dipeptidyl<br>Peptidase 7<br>( <i>DPP7</i> )  | 2.447 |
| 34 |                                          | 1.79 | 8.05358E-06 | A0A0D9S372 | ORM1-like protein OS=Chlorocebus sabaeus<br>OX=60711 GN=ORMDL3 PE=3 SV=1                                                                      | ORMDL<br>Sphingolipid<br>Biosynthesis<br>Regulator 3<br>( <i>ORMDL3</i> ) | 1.473 |
| 35 |                                          | 1.79 | 8.05358E-06 | A0A0D9RNP1 | ADP-ribosylation factor-like 8A, isoform<br>CRA_a(predicted) OS=Chlorocebus sabaeus<br>OX=60711 GN=ARL8A PE=3 SV=1                            | ADP Ribosylation<br>Factor Like<br>GTPase 8A<br>( <i>ARL8A</i> )          | 1.397 |
| 36 |                                          | 1.79 | 8.05358E-06 | A0A0D9R6W4 | Ig-like domain-containing protein<br>OS=Chlorocebus sabaeus OX=60711 PE=3<br>SV=1                                                             | –                                                                         | 1.721 |
| 37 |                                          | 1.79 | 8.05358E-06 | A0A0D9RC71 | DSN1 component of MIS12 kinetochore<br>complex OS=Chlorocebus sabaeus OX=60711<br>GN=DSN1 PE=4 SV=1                                           | DSN1<br>Component Of<br>MIS12<br>Kinetochore<br>Complex ( <i>DSN1</i> )   | 1.482 |
| 38 | regulation of<br>leukocyte<br>activation | 1.43 | 0.04257892  | A0A0D9R8A5 | Dedicator of cytokinesis protein 8(predicted)<br>OS=Chlorocebus sabaeus OX=60711<br>GN=DOCK8 PE=3 SV=1                                        | Dedicator Of<br>Cytokinesis 8<br>( <i>DOCK8</i> )                         | 1.308 |
| 39 |                                          | 1.43 | 0.04257892  | A0A0D9RVU7 | CN hydrolase domain-containing protein<br>OS=Chlorocebus sabaeus OX=60711<br>GN=VNN1 PE=3 SV=1                                                | Vanin 1 ( <i>VNN1</i> )                                                   | 5.144 |
| 40 |                                          | 1.43 | 0.04257892  | A0A0D9SBP1 | Major prion protein OS=Chlorocebus sabaeus<br>OX=60711 GN=PRNP PE=3 SV=1                                                                      | Prion Protein<br>( <i>PRNP</i> )                                          | 1.365 |
| 41 |                                          | 1.43 | 0.04257892  | A0A0D9RMV2 | Zinc finger and BTB domain-containing protein                                                                                                 | Zinc Finger And                                                           | 1.48  |

|    |      |            |            |                                                                                                          |                                                                             |       |
|----|------|------------|------------|----------------------------------------------------------------------------------------------------------|-----------------------------------------------------------------------------|-------|
|    |      |            |            | 1 isoform 2(predicted) OS=Chlorocebus sabaesus<br>OX=60711 GN=ZBTB1 PE=4 SV=1                            | BTB Domain<br>Containing 1<br>( <i>ZBTB1</i> )                              |       |
| 42 | 1.43 | 0.04257892 | A0A0D9R6W4 | Ig-like domain-containing protein<br>OS=Chlorocebus sabaesus OX=60711 PE=3<br>SV=1                       | –                                                                           | 1.721 |
| 43 | 1.43 | 0.04257892 | A0A0D9RPX9 | C2H2-type domain-containing protein<br>OS=Chlorocebus sabaesus OX=60711<br>GN=ZNF608 PE=4 SV=1           | Zinc Finger<br>Protein 608<br>( <i>ZNF608</i> )                             | 1.658 |
| 44 | 1.43 | 0.04257892 | A0A0D9S5B6 | ZBTB7B isoform 2(predicted) OS=Chlorocebus<br>sabaesus OX=60711 GN=ZBTB7B PE=4 SV=1                      | Zinc Finger And<br>BTB Domain<br>Containing 7B<br>( <i>ZBTB7B</i> )         | 1.443 |
| 45 | 1.43 | 0.04257892 | A0A0D9RNB6 | PKD domain-containing protein<br>OS=Chlorocebus sabaesus OX=60711<br>GN=GPNMB PE=4 SV=1                  | Glycoprotein<br>Nmb ( <i>GPNMB</i> )                                        | 2.249 |
| 46 | 1.43 | 0.04257892 | A0A0D9RTD5 | RPN13_C domain-containing protein<br>OS=Chlorocebus sabaesus OX=60711<br>GN=ADRM1 PE=3 SV=1              | ADRM1 26S<br>Proteasome<br>Ubiquitin<br>Receptor<br>( <i>ADRM1</i> )        | 1.526 |
| 47 | 1.43 | 0.04257892 | A0A0D9RTH5 | RING-CH-type domain-containing protein<br>OS=Chlorocebus sabaesus OX=60711<br>GN=MARCHF7 PE=4 SV=1       | Membrane<br>Associated Ring-<br>CH-Type Finger 7<br>( <i>MARCHF7</i> )      | 1.313 |
| 48 | 1.43 | 0.04257892 | A0A0D9RCQ5 | Tyrosine-protein phosphatase non-receptor type<br>OS=Chlorocebus sabaesus OX=60711<br>GN=PTPN6 PE=3 SV=1 | Protein Tyrosine<br>Phosphatase Non-<br>Receptor Type 6<br>( <i>PTPN6</i> ) | 1.338 |
| 49 | 1.43 | 0.04257892 | A0A0D9RIY8 | Nedd4 family interacting protein 1(predicted)                                                            | Nedd4 Family                                                                | 1.302 |

|    |      |            |            |                                                                                                         |                                                           |       |
|----|------|------------|------------|---------------------------------------------------------------------------------------------------------|-----------------------------------------------------------|-------|
|    |      |            |            | OS=Chlorocebus sabaesus OX=60711<br>GN=NDFIP1 PE=4 SV=1                                                 | Interacting<br>Protein 1<br>( <i>NDFIP1</i> )             |       |
| 50 | 1.43 | 0.04257892 | A0A0D9S385 | FA complementation group A OS=Chlorocebus<br>sabaesus OX=60711 GN=FANCA PE=4 SV=1                       | FA<br>Complementation<br>Group A ( <i>FANCA</i> )         | 1.438 |
| 51 | 1.43 | 0.04257892 | A0A0D9RPF5 | Syndecan OS=Chlorocebus sabaesus OX=60711<br>GN=SDC4 PE=3 SV=1                                          | Syndecan 4<br>( <i>SDC4</i> )                             |       |
| 52 | 1.43 | 0.04257892 | A0A0D9RHA5 | Ephrin RBD domain-containing protein<br>OS=Chlorocebus sabaesus OX=60711<br>GN=EFNB1 PE=3 SV=1          | Ephrin B1<br>( <i>EFNB1</i> )                             |       |
| 53 | 1.43 | 0.04257892 | A0A0D9RAN9 | Ig-like domain-containing protein<br>OS=Chlorocebus sabaesus OX=60711 PE=4<br>SV=1                      | —                                                         |       |
| 54 | 1.43 | 0.04257892 | A0A0D9RL01 | ZFP36 ring finger protein like 1(predicted)<br>OS=Chlorocebus sabaesus OX=60711<br>GN=ZFP36L1 PE=4 SV=1 | ZFP36 Ring<br>Finger Protein<br>Like 1 ( <i>ZFP36L1</i> ) |       |
| 55 | 1.43 | 0.04257892 | A0A0D9RNY8 | Adenosine deaminase OS=Chlorocebus sabaesus<br>OX=60711 PE=3 SV=1                                       | —                                                         |       |
| 56 | 1.43 | 0.04257892 | A0A0D9RPF5 | Syndecan OS=Chlorocebus sabaesus OX=60711<br>GN=SDC4 PE=3 SV=1                                          | Syndecan 4<br>( <i>SDC4</i> )                             | 1.366 |
| 57 | 1.43 | 0.04257892 | A0A0D9RHA5 | Ephrin RBD domain-containing protein<br>OS=Chlorocebus sabaesus OX=60711<br>GN=EFNB1 PE=3 SV=1          | Ephrin B1<br>( <i>EFNB1</i> )                             | 1.363 |
| 58 | 1.43 | 0.04257892 | A0A0D9RAN9 | Ig-like domain-containing protein<br>OS=Chlorocebus sabaesus OX=60711 PE=4<br>SV=1                      | —                                                         | 1.557 |
| 59 | 1.43 | 0.04257892 | A0A0D9RL01 | ZFP36 ring finger protein like 1(predicted)<br>OS=Chlorocebus sabaesus OX=60711<br>GN=ZFP36L1 PE=4 SV=1 | ZFP36 Ring<br>Finger Protein<br>Like 1 ( <i>ZFP36L1</i> ) | 1.564 |

|    |                                               |      |             |            |                                                                                                                          |                                                              |       |
|----|-----------------------------------------------|------|-------------|------------|--------------------------------------------------------------------------------------------------------------------------|--------------------------------------------------------------|-------|
| 60 |                                               | 1.43 | 0.04257892  | A0A0D9RNY8 | Adenosine deaminase OS=Chlorocebus sabaesus OX=60711 PE=3 SV=1                                                           | –                                                            | 1.529 |
| 61 |                                               | 1.43 | 0.04257892  | A0A0D9RPF5 | Syndecan OS=Chlorocebus sabaesus OX=60711 GN=SDC4 PE=3 SV=1                                                              | Syndecan 4 ( <i>SDC4</i> )                                   | 1.366 |
| 62 |                                               | 1.43 | 0.04257892  | A0A0D9RHA5 | Ephrin RBD domain-containing protein OS=Chlorocebus sabaesus OX=60711 GN=EFNB1 PE=3 SV=1                                 | Ephrin B1 ( <i>EFNB1</i> )                                   | 1.363 |
| 63 |                                               | 1.43 | 0.04257892  | A0A0D9RAN9 | Ig-like domain-containing protein OS=Chlorocebus sabaesus OX=60711 PE=4 SV=1                                             | –                                                            | 1.557 |
| 64 |                                               | 1.43 | 0.04257892  | A0A0D9RL01 | ZFP36 ring finger protein like 1(predicted) OS=Chlorocebus sabaesus OX=60711 GN=ZFP36L1 PE=4 SV=1                        | ZFP36 Ring Finger Protein Like 1 ( <i>ZFP36L1</i> )          | 1.564 |
| 65 |                                               | 1.43 | 0.04257892  | A0A0D9RNY8 | Adenosine deaminase OS=Chlorocebus sabaesus OX=60711 PE=3 SV=1                                                           | –                                                            | 1.529 |
| 66 |                                               | 1.43 | 0.04257892  | A0A0D9RPF5 | Syndecan OS=Chlorocebus sabaesus OX=60711 GN=SDC4 PE=3 SV=1                                                              | Syndecan 4 ( <i>SDC4</i> )                                   | 1.366 |
| 67 | positive regulation of T cell differentiation | 2.25 | 0.043744343 | A0A0D9S8W1 | Protein kinase C OS=Chlorocebus sabaesus OX=60711 GN=PRKCZ PE=3 SV=1                                                     | Protein Kinase C Zeta ( <i>PRKCZ</i> )                       | 2.645 |
| 68 |                                               | 2.25 | 0.043744343 | A0A0D9RBA8 | TGF-beta receptor type-2 OS=Chlorocebus sabaesus OX=60711 GN=TGFBR2 PE=3 SV=1                                            | Transforming Growth Factor Beta Receptor 2 ( <i>TGFBR2</i> ) | 1.36  |
| 69 |                                               | 2.25 | 0.043744343 | A0A0D9RVU7 | CN hydrolase domain-containing protein OS=Chlorocebus sabaesus OX=60711 GN=VNN1 PE=3 SV=1                                | Vanin 1 ( <i>VNN1</i> )                                      | 5.144 |
| 70 |                                               | 2.25 | 0.043744343 | A0A0D9RMV2 | Zinc finger and BTB domain-containing protein 1 isoform 2(predicted) OS=Chlorocebus sabaesus OX=60711 GN=ZBTB1 PE=4 SV=1 | Zinc Finger And BTB Domain Containing 1 ( <i>ZBTB1</i> )     | 1.48  |

|    |                 |      |             |            |                                                                                                |                                                             |       |
|----|-----------------|------|-------------|------------|------------------------------------------------------------------------------------------------|-------------------------------------------------------------|-------|
| 71 |                 | 2.25 | 0.043744343 | A0A0D9S5B6 | ZBTB7B isoform 2(predicted) OS=Chlorocebus sabaenus OX=60711 GN=ZBTB7B PE=4 SV=1               | Zinc Finger And BTB Domain Containing 7B ( <i>ZBTB7B</i> )  | 1.443 |
| 72 | immune response | 1.44 | 0.000385524 | A0A0D9RI88 | Ribonuclease T2(predicted) OS=Chlorocebus sabaenus OX=60711 PE=3 SV=1                          | –                                                           | 1.829 |
| 73 |                 | 1.44 | 0.000385524 | A0A0D9R6H0 | Maltase-glucoamylase, intestinal(predicted) OS=Chlorocebus sabaenus OX=60711 GN=MGAM PE=3 SV=1 | Maltase-Glucoamylase ( <i>MGAM</i> )                        | 2.445 |
| 74 |                 | 1.44 | 0.000385524 | A0A0D9RK06 | Phospholipase OS=Chlorocebus sabaenus OX=60711 GN=PLD1 PE=3 SV=1                               | Phospholipase D1 ( <i>PLD1</i> )                            | 1.575 |
| 75 |                 | 1.44 | 0.000385524 | A0A0D9RWL1 | Cathepsin B OS=Chlorocebus sabaenus OX=60711 GN=CTSB PE=3 SV=1                                 | Cathepsin B ( <i>CTSB</i> )                                 | 1.452 |
| 76 |                 | 1.44 | 0.000385524 | A0A0D9RRW7 | Sulfatase domain-containing protein OS=Chlorocebus sabaenus OX=60711 GN=ARSB PE=3 SV=1         | Arylsulfatase B ( <i>ARSB</i> )                             | 2.106 |
| 77 |                 | 1.44 | 0.000385524 | A0A0D9QZJ6 | COMM domain-containing protein OS=Chlorocebus sabaenus OX=60711 GN=COMMD9 PE=4 SV=1            | COMM Domain Containing 9 ( <i>COMMD9</i> )                  | 1.308 |
| 78 |                 | 1.44 | 0.000385524 | A0A0D9RC71 | DSN1 component of MIS12 kinetochore complex OS=Chlorocebus sabaenus OX=60711 GN=DSN1 PE=4 SV=1 | DSN1 Component Of MIS12 Kinetochore Complex ( <i>DSN1</i> ) | 1.482 |
| 79 |                 | 1.44 | 0.000385524 | A0A0D9REY5 | GM2 ganglioside activator OS=Chlorocebus sabaenus OX=60711 GN=GM2A PE=4 SV=1                   | GM2 Ganglioside Activator ( <i>GM2A</i> )                   | 1.906 |
| 80 |                 | 1.44 | 0.000385524 | A0A0D9RVU7 | CN hydrolase domain-containing protein OS=Chlorocebus sabaenus OX=60711 GN=VNN1 PE=3 SV=1      | Vanin 1 ( <i>VNN1</i> )                                     | 5.144 |
| 81 |                 | 1.44 | 0.000385524 | A0A0D9S4B2 | P-type domain-containing protein                                                               | Alpha                                                       | 1.591 |

|    |      |             |            |                                                                                                                                                   |                                                                           |       |
|----|------|-------------|------------|---------------------------------------------------------------------------------------------------------------------------------------------------|---------------------------------------------------------------------------|-------|
| 82 | 1.44 | 0.000385524 | A0A0D9RB33 | OS=Chlorocebus sabaeus OX=60711 GN=GAA<br>PE=3 SV=1<br>Ig-like domain-containing protein<br>OS=Chlorocebus sabaeus OX=60711<br>GN=TAPBP PE=4 SV=1 | Glucosidase<br>( <i>GAA</i> )<br>TAP Binding<br>Protein ( <i>TAPBP</i> )  | 1.646 |
| 83 | 1.44 | 0.000385524 | A0A0D9RSR2 | Grancalcin(predicted) OS=Chlorocebus sabaeus<br>OX=60711 GN=GCA PE=4 SV=1                                                                         | Grancalcin ( <i>GCA</i> )                                                 | 1.338 |
| 84 | 1.44 | 0.000385524 | A0A0D9RTW6 | Clusterin OS=Chlorocebus sabaeus OX=60711<br>GN=CLU PE=3 SV=1                                                                                     | Clusterin ( <i>CLU</i> )                                                  | 1.439 |
| 85 | 1.44 | 0.000385524 | A0A0D9R149 | Nitrilase family member 2 OS=Chlorocebus<br>sabaeus OX=60711 GN=NIT2 PE=4 SV=1                                                                    | Member 2 ( <i>NIT2</i> )                                                  | 1.39  |
| 86 | 1.44 | 0.000385524 | A0A0D9S372 | ORM1-like protein OS=Chlorocebus sabaeus<br>OX=60711 GN=ORMDL3 PE=3 SV=1                                                                          | ORMDL<br>Sphingolipid<br>Biosynthesis<br>Regulator 3<br>( <i>ORMDL3</i> ) | 1.473 |
| 87 | 1.44 | 0.000385524 | A0A0D9RNP1 | ADP-ribosylation factor-like 8A, isoform<br>CRA_a(predicted) OS=Chlorocebus sabaeus<br>OX=60711 GN=ARL8A PE=3 SV=1                                | ADP Ribosylation<br>Factor Like<br>GTPase 8A<br>( <i>ARL8A</i> )          | 1.397 |
| 88 | 1.44 | 0.000385524 | A0A0D9RAI2 | LIM zinc-binding domain-containing protein<br>OS=Chlorocebus sabaeus OX=60711 PE=4<br>SV=1                                                        | –                                                                         | 2.133 |
| 89 | 1.44 | 0.000385524 | A0A0D9QZB2 | Gamma-interferon-inducible lysosomal thiol<br>reductase preproprotein(predicted)<br>OS=Chlorocebus sabaeus OX=60711 GN=IFI30<br>PE=3 SV=1         | IFI30 Lysosomal<br>Thiol Reductase<br>( <i>IFI30</i> )                    | 1.687 |
| 90 | 1.44 | 0.000385524 | A0A0D9R167 | B cell linker OS=Chlorocebus sabaeus<br>OX=60711 GN=BLNK PE=4 SV=1                                                                                | B Cell Linker<br>( <i>BLNK</i> )                                          | 1.652 |
| 91 | 1.44 | 0.000385524 | A0A0D9R6W4 | Ig-like domain-containing protein                                                                                                                 | –                                                                         | 1.721 |

|    |      |             |            |                                                                                                                                          |                                                               |       |
|----|------|-------------|------------|------------------------------------------------------------------------------------------------------------------------------------------|---------------------------------------------------------------|-------|
| 92 | 1.44 | 0.000385524 | A0A0D9S4W5 | OS=Chlorocebus sabaenus OX=60711 PE=3<br>SV=1<br>Junctional adhesion molecule 3<br>OS=Chlorocebus sabaenus OX=60711<br>GN=JAM3 PE=4 SV=1 | Junctional<br>Adhesion<br>Molecule 3<br>(JAM3)                | 1.424 |
| 93 | 1.44 | 0.000385524 | A0A0D9RC57 | CUE domain-containing protein<br>OS=Chlorocebus sabaenus OX=60711<br>GN=TOLLIP PE=3 SV=1                                                 | Toll Interacting<br>Protein ( <i>TOLLIP</i> )                 | 1.434 |
| 94 | 1.44 | 0.000385524 | A0A0D9RCE1 | Isocitrate dehydrogenase [NADP]<br>OS=Chlorocebus sabaenus OX=60711 GN=IDH1<br>PE=3 SV=1                                                 | Isocitrate<br>Dehydrogenase<br>(NADP(+)) 1<br>( <i>IDH1</i> ) | 1.455 |
| 95 | 1.44 | 0.000385524 | A0A0D9RVB6 | Dipeptidyl peptidase 2 preproprotein(predicted)<br>OS=Chlorocebus sabaenus OX=60711 GN=DPP7<br>PE=3 SV=1                                 | Dipeptidyl<br>Peptidase 7<br>( <i>DPP7</i> )                  | 2.447 |
| 96 | 1.44 | 0.000385524 | A0A0D9R7Z3 | Prosaposin OS=Chlorocebus sabaenus OX=60711<br>GN=PSAP PE=4 SV=1                                                                         | Prosaposin<br>( <i>PSAP</i> )                                 | 1.511 |

---
